# Supplementary material for: Greenness and allergies: evidence of differential associations in two areas in Germany
Source: PubMed Central journal article supplement — J Epidemiol Community Health. 2014 May 26;68(8):787–90. doi: 10.1136/jech-2014-203903 (PMC4112441; doi:10.1136/jech-2014-203903), 2014-05-26
Supplement: jech-2014-203903-s1.pdf [file jech-2014-203903-s1.pdf]

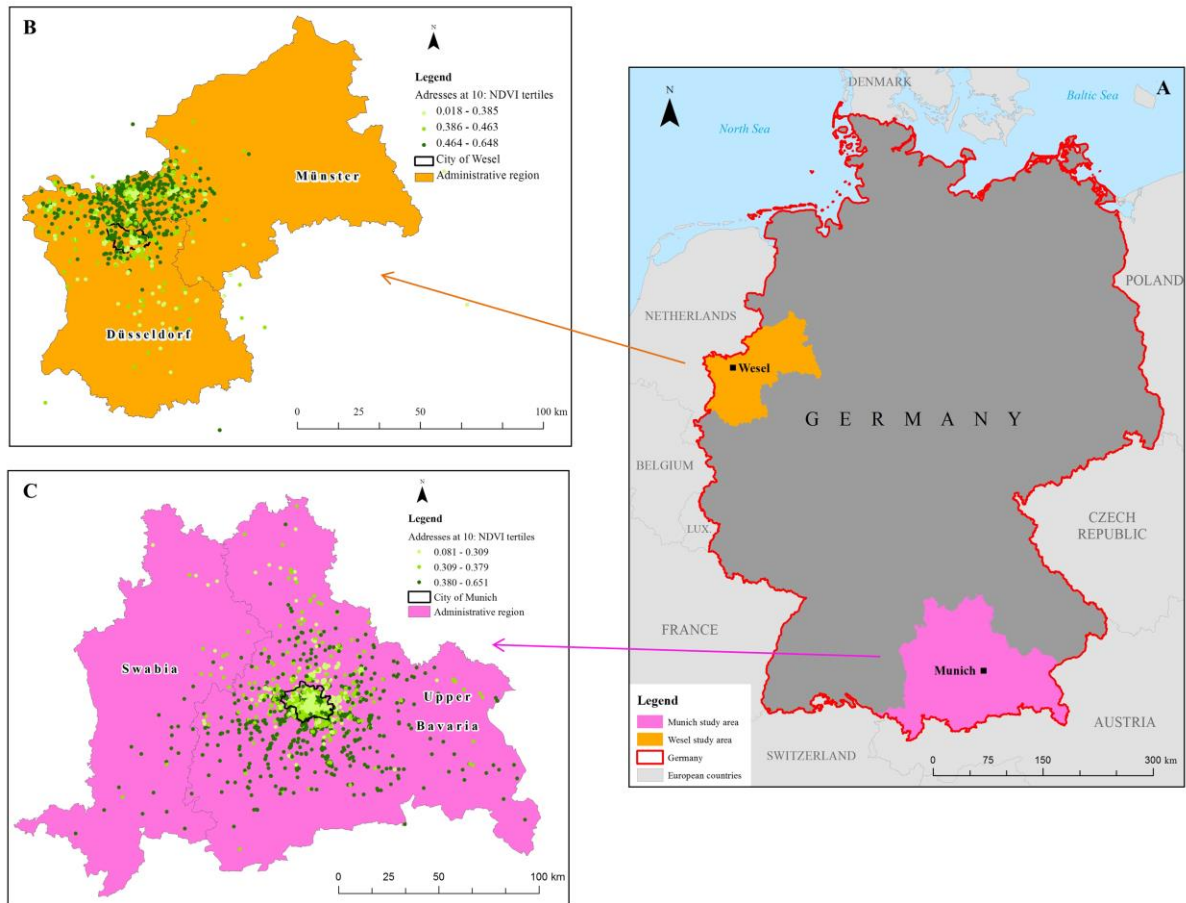

**Supplementary Material, Figure S1:** Location of the GINI/LISA North and GINI/LISA South study areas on the map of Germany (A) and spatial distribution of mean greenness in a 500 m buffer around the home address at ten years of participants in GINI/LISA North (B) and GINI/LISA South (C).
