# Supplementary material for: Greenness and allergies: evidence of differential associations in two areas in Germany
Source: PubMed Central journal article supplement — J Epidemiol Community Health. 2014 May 26;68(8):787–90. doi: 10.1136/jech-2014-203903 (PMC4112441; doi:10.1136/jech-2014-203903), 2014-05-26
Supplement: jech-2014-203903-s2.pdf [file jech-2014-203903-s2.pdf]

**Table S1:** Characteristics of study participants

|                                           |                           | Total (N = 5803) |      | GINI/LISA South (N = 3306) |      | GINI/LISA North (N = 2497) |      | P-value * |
|-------------------------------------------|---------------------------|------------------|------|----------------------------|------|----------------------------|------|-----------|
|                                           |                           | n/N              | %    | n/N                        | %    | n/N                        | %    |           |
| <b>General characteristics</b>            |                           |                  |      |                            |      |                            |      |           |
| Males                                     |                           | 2992/5803        | 51.6 | 1716/3306                  | 51.9 | 1276/2497                  | 51.1 | 0.562     |
| Parental history of atopy                 |                           | 3381/5765        | 58.6 | 2193/3284                  | 66.8 | 1188/2481                  | 47.9 | <0.001    |
| Presence of older siblings                |                           | 2729/5789        | 47.1 | 1374/3301                  | 41.6 | 1355/2488                  | 54.5 | <0.001    |
| Smoking                                   | During pregnancy          | 820/5660         | 14.5 | 426/3214                   | 13.3 | 394/2446                   | 16.1 | 0.003     |
|                                           | Ever in home (1-4 years)  | 1969/5022        | 39.2 | 878/2935                   | 29.9 | 1091/2087                  | 52.3 | <0.001    |
| Parental education                        | < 10 years                | 492/5782         | 8.5  | 171/3294                   | 5.2  | 321/2488                   | 12.9 | <0.001    |
|                                           | = 10 years                | 1577/5782        | 27.3 | 579/3294                   | 17.6 | 998/2488                   | 40.1 |           |
|                                           | > 10 years                | 3713/5782        | 64.2 | 2544/3294                  | 77.2 | 1169/2488                  | 47.0 |           |
| Cohort                                    | GINIplus observation arm  | 2410/5803        | 41.5 | 1054/3306                  | 31.9 | 1356/2497                  | 54.3 | <0.001    |
|                                           | GINIplus intervention arm | 1888/5803        | 32.5 | 1015/3306                  | 30.7 | 873/2497                   | 35.0 |           |
|                                           | LISAplus                  | 1505/5803        | 25.9 | 1237/3306                  | 37.4 | 268/2497                   | 10.7 |           |
| Owned furry pet during early life         |                           | 932/5566         | 16.7 | 497/3183                   | 15.6 | 435/2383                   | 18.3 | 0.010     |
| Lived on a farm during early life         |                           | 242/5177         | 4.7  | 40/3070                    | 1.3  | 202/2107                   | 9.6  | <0.001    |
| Moved between birth and 10 years          |                           | 3009/4741        | 63.5 | 1973/2837                  | 69.5 | 1036/1904                  | 54.4 | <0.001    |
| <b>Health outcomes at 10 years of age</b> |                           |                  |      |                            |      |                            |      |           |
| Doctor diagnosed allergic rhinitis        |                           | 406/4148         | 9.8  | 268/2483                   | 10.8 | 138/1665                   | 8.3  | 0.09      |
| Eyes and nose symptoms                    |                           | 549/4250         | 12.9 | 378/2540                   | 14.9 | 171/1710                   | 10.0 | <0.001    |
| Sensitized to aeroallergens               |                           | 972/2424         | 40.1 | 669/1558                   | 42.9 | 303/866                    | 35.0 | <0.001    |
| Sensitized to indoor aeroallergens        |                           | 656/2421         | 27.1 | 442/1556                   | 28.4 | 214/865                    | 24.7 | 0.058     |
| Sensitized to outdoor aeroallergens       |                           | 722/2423         | 29.8 | 500/1558                   | 32.1 | 222/865                    | 25.7 | 0.001     |

\* Differences across the GINI/LISA South and GINI/LISA North areas tested by the Chi-squared test
